# Supplementary material for: Prognostic Risk Model of Immune-Related Genes in Colorectal Cancer
Source: Front Genet. 2021 Mar 4;12:619611. doi: 10.3389/fgene.2021.619611 (PMC7970128; doi:10.3389/fgene.2021.619611)
Supplement: Supplementary file 2 [file Table_1.xlsx]

## Sheet: Sheet1
#term ID	term description	observed gene count	background gene count	false discovery rate	matching proteins in your network (IDs)	matching proteins in your network (labels)
GO:0005515	protein binding	45	6605	1.28e-09	ENSP00000172229,ENSP00000201031,ENSP00000231509,ENSP00000231721,ENSP00000242208,ENSP00000244745,ENSP00000256495,ENSP00000257818,ENSP00000262904,ENSP00000263317,ENSP00000263734,ENSP00000263754,ENSP00000264498,ENSP00000266970,ENSP00000290271,ENSP00000293825,ENSP00000295755,ENSP00000296370,ENSP00000298532,ENSP00000300305,ENSP00000301633,ENSP00000304133,ENSP00000305416,ENSP00000308815,ENSP00000309338…	A2M,BHLHE40,BIRC5,CCL19,CCL28,CD1B,CD79B,CDK2,CENPA,CLCF1,CXCL12,E2F3,EPAS1,FGF2,FOXP3,GUCA2A,H2AFX,IL1RAP,INHBA,JAG2,KAT2B,KLF4,LMO2,MYH11,NGF,NGFR,NOX4,NPR1,NR3C1,PBX1,PLCG2,PTH1R,RETNLB,RUNX1,S100P,S1PR1,SCG2,SEMA3G,SLIT2,SNAPC4,SOX4,STC1,TFAP2C,TNFSF12,VIP
GO:0043565	sequence-specific DNA binding	19	1047	9.11e-09	ENSP00000201031,ENSP00000231509,ENSP00000244745,ENSP00000256495,ENSP00000257818,ENSP00000262904,ENSP00000263734,ENSP00000263754,ENSP00000298532,ENSP00000300305,ENSP00000310170,ENSP00000320147,ENSP00000327048,ENSP00000350815,ENSP00000363149,ENSP00000363804,ENSP00000365380,ENSP00000405890,ENSP00000471921	BHLHE40,E2F3,EPAS1,EZH2,FOSL1,FOXP3,KAT2B,KLF4,LMO2,MAF,NR3C1,NR3C2,PBX1,RUNX1,SNAPC4,SOX4,SPDEF,SPIB,TFAP2C
GO:0048018	receptor ligand activity	14	458	9.11e-09	ENSP00000242208,ENSP00000264498,ENSP00000290271,ENSP00000293825,ENSP00000295755,ENSP00000304133,ENSP00000308815,ENSP00000309338,ENSP00000328169,ENSP00000349493,ENSP00000354416,ENSP00000356213,ENSP00000358525,ENSP00000379140	CCL19,CCL28,CLCF1,CXCL12,FGF2,GUCA2A,INHBA,JAG2,NGF,RETNLB,SCG2,STC1,TNFSF12,VIP
GO:0001228	DNA-binding transcription activator activity, RNA polymerase II-specific	12	408	1.59e-07	ENSP00000201031,ENSP00000231509,ENSP00000244745,ENSP00000257818,ENSP00000262904,ENSP00000263734,ENSP00000300305,ENSP00000310170,ENSP00000327048,ENSP00000363804,ENSP00000405890,ENSP00000471921	E2F3,EPAS1,FOSL1,KLF4,LMO2,MAF,NR3C1,PBX1,RUNX1,SOX4,SPIB,TFAP2C
GO:0005488	binding	54	11878	1.93e-07	ENSP00000172229,ENSP00000201031,ENSP00000231509,ENSP00000231721,ENSP00000242208,ENSP00000244745,ENSP00000256495,ENSP00000257818,ENSP00000262904,ENSP00000263317,ENSP00000263734,ENSP00000263754,ENSP00000264498,ENSP00000266970,ENSP00000290271,ENSP00000293825,ENSP00000295755,ENSP00000296370,ENSP00000298532,ENSP00000300305,ENSP00000301633,ENSP00000304133,ENSP00000305416,ENSP00000308815,ENSP00000309338…	A2M,BHLHE40,BIRC5,CCL19,CCL28,CD1B,CD79B,CDK2,CENPA,CLCF1,COLEC12,CXCL12,E2F3,EPAS1,EZH2,FGF2,FOSL1,FOXP3,GUCA2A,H2AFX,IL1RAP,INHBA,JAG2,KAT2B,KLF4,LMO2,MAF,MYH11,NGF,NGFR,NOX4,NPR1,NR3C1,NR3C2,PBX1,PLCG2,PTGDS,PTH1R,RETNLB,RUNX1,S100P,S1PR1,SCG2,SEMA3G,SLIT2,SNAPC4,SOX4,SPDEF,SPIB,STC1,TFAP2C,TLR7,TNFSF12,VIP
GO:0000976	transcription regulatory region sequence-specific DNA binding	14	710	4.87e-07	ENSP00000201031,ENSP00000231509,ENSP00000244745,ENSP00000256495,ENSP00000257818,ENSP00000262904,ENSP00000263754,ENSP00000300305,ENSP00000310170,ENSP00000320147,ENSP00000363804,ENSP00000365380,ENSP00000405890,ENSP00000471921	BHLHE40,E2F3,EZH2,FOSL1,FOXP3,KAT2B,KLF4,LMO2,NR3C1,PBX1,RUNX1,SOX4,SPIB,TFAP2C
GO:0000987	proximal promoter sequence-specific DNA binding	12	475	4.87e-07	ENSP00000201031,ENSP00000231509,ENSP00000244745,ENSP00000256495,ENSP00000257818,ENSP00000262904,ENSP00000300305,ENSP00000310170,ENSP00000320147,ENSP00000363804,ENSP00000365380,ENSP00000405890	BHLHE40,E2F3,EZH2,FOSL1,FOXP3,KLF4,LMO2,NR3C1,PBX1,RUNX1,SOX4,TFAP2C
GO:0044212	transcription regulatory region DNA binding	15	829	4.87e-07	ENSP00000201031,ENSP00000231509,ENSP00000244745,ENSP00000256495,ENSP00000257818,ENSP00000262904,ENSP00000263754,ENSP00000298532,ENSP00000300305,ENSP00000310170,ENSP00000320147,ENSP00000363804,ENSP00000365380,ENSP00000405890,ENSP00000471921	BHLHE40,E2F3,EZH2,FOSL1,FOXP3,KAT2B,KLF4,LMO2,NR3C1,PBX1,RUNX1,SNAPC4,SOX4,SPIB,TFAP2C
GO:0005102	signaling receptor binding	19	1513	7.61e-07	ENSP00000231721,ENSP00000242208,ENSP00000264498,ENSP00000290271,ENSP00000293825,ENSP00000295755,ENSP00000296370,ENSP00000304133,ENSP00000305416,ENSP00000308815,ENSP00000309338,ENSP00000323929,ENSP00000328169,ENSP00000349493,ENSP00000354416,ENSP00000356213,ENSP00000358525,ENSP00000379140,ENSP00000422591	A2M,CCL19,CCL28,CLCF1,CXCL12,FGF2,GUCA2A,INHBA,JAG2,NGF,RETNLB,S100P,S1PR1,SCG2,SEMA3G,SLIT2,STC1,TNFSF12,VIP
GO:0000977	RNA polymerase II regulatory region sequence-specific DNA binding	13	647	9.54e-07	ENSP00000201031,ENSP00000231509,ENSP00000244745,ENSP00000256495,ENSP00000257818,ENSP00000263754,ENSP00000300305,ENSP00000310170,ENSP00000320147,ENSP00000363804,ENSP00000365380,ENSP00000405890,ENSP00000471921	BHLHE40,EZH2,FOSL1,FOXP3,KAT2B,KLF4,LMO2,NR3C1,PBX1,RUNX1,SOX4,SPIB,TFAP2C
GO:0000978	RNA polymerase II proximal promoter sequence-specific DNA binding	11	457	1.84e-06	ENSP00000201031,ENSP00000231509,ENSP00000244745,ENSP00000256495,ENSP00000257818,ENSP00000300305,ENSP00000310170,ENSP00000320147,ENSP00000363804,ENSP00000365380,ENSP00000405890	BHLHE40,EZH2,FOSL1,FOXP3,KLF4,LMO2,NR3C1,PBX1,RUNX1,SOX4,TFAP2C
GO:0046983	protein dimerization activity	17	1301	2.09e-06	ENSP00000201031,ENSP00000242208,ENSP00000244745,ENSP00000256495,ENSP00000262904,ENSP00000263734,ENSP00000296370,ENSP00000300305,ENSP00000301633,ENSP00000309338,ENSP00000321999,ENSP00000336868,ENSP00000365380,ENSP00000376544,ENSP00000405890,ENSP00000422591,ENSP00000434024	BHLHE40,BIRC5,CD79B,CENPA,CLCF1,E2F3,EPAS1,FOXP3,H2AFX,INHBA,PBX1,PTH1R,RUNX1,S100P,SLIT2,SOX4,TFAP2C
GO:0005125	cytokine activity	8	216	4.65e-06	ENSP00000242208,ENSP00000264498,ENSP00000293825,ENSP00000304133,ENSP00000308815,ENSP00000309338,ENSP00000354416,ENSP00000379140	CCL19,CCL28,CLCF1,CXCL12,FGF2,INHBA,SCG2,TNFSF12
GO:0098772	molecular function regulator	19	1793	7.01e-06	ENSP00000242208,ENSP00000263754,ENSP00000264498,ENSP00000290271,ENSP00000293825,ENSP00000295755,ENSP00000301633,ENSP00000304133,ENSP00000308815,ENSP00000309338,ENSP00000323929,ENSP00000328169,ENSP00000349493,ENSP00000354416,ENSP00000356213,ENSP00000358525,ENSP00000363804,ENSP00000379140,ENSP00000422591	A2M,BIRC5,CCL19,CCL28,CLCF1,CXCL12,FGF2,GUCA2A,INHBA,JAG2,KAT2B,KLF4,NGF,RETNLB,SCG2,SLIT2,STC1,TNFSF12,VIP
GO:0000981	DNA-binding transcription factor activity, RNA polymerase II-specific	18	1631	8.31e-06	ENSP00000201031,ENSP00000231509,ENSP00000244745,ENSP00000256495,ENSP00000257818,ENSP00000262904,ENSP00000263734,ENSP00000298532,ENSP00000300305,ENSP00000310170,ENSP00000320147,ENSP00000327048,ENSP00000350815,ENSP00000363149,ENSP00000363804,ENSP00000365380,ENSP00000405890,ENSP00000471921	BHLHE40,E2F3,EPAS1,EZH2,FOSL1,FOXP3,KLF4,LMO2,MAF,NR3C1,NR3C2,PBX1,RUNX1,SNAPC4,SOX4,SPDEF,SPIB,TFAP2C
GO:0140110	transcription regulator activity	20	2069	1.22e-05	ENSP00000201031,ENSP00000231509,ENSP00000244745,ENSP00000256495,ENSP00000257818,ENSP00000262904,ENSP00000263734,ENSP00000263754,ENSP00000264498,ENSP00000298532,ENSP00000300305,ENSP00000310170,ENSP00000320147,ENSP00000327048,ENSP00000350815,ENSP00000363149,ENSP00000363804,ENSP00000365380,ENSP00000405890,ENSP00000471921	BHLHE40,E2F3,EPAS1,EZH2,FGF2,FOSL1,FOXP3,KAT2B,KLF4,LMO2,MAF,NR3C1,NR3C2,PBX1,RUNX1,SNAPC4,SOX4,SPDEF,SPIB,TFAP2C
GO:0046982	protein heterodimerization activity	10	519	3.65e-05	ENSP00000242208,ENSP00000244745,ENSP00000256495,ENSP00000263734,ENSP00000300305,ENSP00000301633,ENSP00000309338,ENSP00000336868,ENSP00000405890,ENSP00000434024	BHLHE40,BIRC5,CENPA,CLCF1,EPAS1,H2AFX,INHBA,PBX1,RUNX1,SOX4
GO:0003677	DNA binding	21	2457	3.77e-05	ENSP00000201031,ENSP00000231509,ENSP00000244745,ENSP00000256495,ENSP00000257818,ENSP00000262904,ENSP00000263734,ENSP00000263754,ENSP00000298532,ENSP00000300305,ENSP00000310170,ENSP00000320147,ENSP00000327048,ENSP00000336868,ENSP00000350815,ENSP00000363149,ENSP00000363804,ENSP00000365380,ENSP00000405890,ENSP00000434024,ENSP00000471921	BHLHE40,CENPA,E2F3,EPAS1,EZH2,FOSL1,FOXP3,H2AFX,KAT2B,KLF4,LMO2,MAF,NR3C1,NR3C2,PBX1,RUNX1,SNAPC4,SOX4,SPDEF,SPIB,TFAP2C
GO:0008083	growth factor activity	6	160	0.00011	ENSP00000242208,ENSP00000264498,ENSP00000309338,ENSP00000328169,ENSP00000358525,ENSP00000379140	CLCF1,CXCL12,FGF2,INHBA,JAG2,NGF
GO:0005126	cytokine receptor binding	7	272	0.0002	ENSP00000242208,ENSP00000293825,ENSP00000308815,ENSP00000309338,ENSP00000354416,ENSP00000358525,ENSP00000379140	CCL19,CCL28,CLCF1,CXCL12,INHBA,NGF,TNFSF12
GO:0005179	hormone activity	5	123	0.00042	ENSP00000242208,ENSP00000290271,ENSP00000295755,ENSP00000349493,ENSP00000356213	GUCA2A,INHBA,RETNLB,STC1,VIP
GO:0008134	transcription factor binding	9	610	0.0008	ENSP00000256495,ENSP00000257818,ENSP00000263734,ENSP00000263754,ENSP00000298532,ENSP00000300305,ENSP00000363804,ENSP00000365380,ENSP00000405890	BHLHE40,EPAS1,FOXP3,KAT2B,KLF4,LMO2,PBX1,RUNX1,SNAPC4
GO:0003676	nucleic acid binding	22	3332	0.001	ENSP00000201031,ENSP00000231509,ENSP00000244745,ENSP00000256495,ENSP00000257818,ENSP00000262904,ENSP00000263734,ENSP00000263754,ENSP00000298532,ENSP00000300305,ENSP00000310170,ENSP00000320147,ENSP00000327048,ENSP00000336868,ENSP00000350815,ENSP00000363149,ENSP00000363804,ENSP00000365380,ENSP00000370034,ENSP00000405890,ENSP00000434024,ENSP00000471921	BHLHE40,CENPA,E2F3,EPAS1,EZH2,FOSL1,FOXP3,H2AFX,KAT2B,KLF4,LMO2,MAF,NR3C1,NR3C2,PBX1,RUNX1,SNAPC4,SOX4,SPDEF,SPIB,TFAP2C,TLR7
GO:0042056	chemoattractant activity	3	33	0.0017	ENSP00000264498,ENSP00000304133,ENSP00000379140	CXCL12,FGF2,SCG2
GO:0042562	hormone binding	4	90	0.0017	ENSP00000231509,ENSP00000242208,ENSP00000321999,ENSP00000357669	INHBA,NPR1,NR3C1,PTH1R
GO:0017046	peptide hormone binding	3	43	0.0033	ENSP00000242208,ENSP00000321999,ENSP00000357669	INHBA,NPR1,PTH1R
GO:0008009	chemokine activity	3	48	0.0044	ENSP00000308815,ENSP00000354416,ENSP00000379140	CCL19,CCL28,CXCL12
GO:0001134	transcription regulator recruiting activity	2	10	0.0052	ENSP00000298532,ENSP00000363804	KLF4,SNAPC4
GO:0060089	molecular transducer activity	12	1483	0.0095	ENSP00000172229,ENSP00000231509,ENSP00000266970,ENSP00000305416,ENSP00000311733,ENSP00000314807,ENSP00000321999,ENSP00000350815,ENSP00000357669,ENSP00000370034,ENSP00000376544,ENSP00000383115	CD79B,CDK2,CMKLR1,COLEC12,IL1RAP,NGFR,NPR1,NR3C1,NR3C2,PTH1R,S1PR1,TLR7
GO:1901363	heterocyclic compound binding	26	5305	0.019	ENSP00000201031,ENSP00000231509,ENSP00000244745,ENSP00000256495,ENSP00000257818,ENSP00000262904,ENSP00000263317,ENSP00000263734,ENSP00000263754,ENSP00000266970,ENSP00000298532,ENSP00000300305,ENSP00000310170,ENSP00000320147,ENSP00000327048,ENSP00000336868,ENSP00000350815,ENSP00000357669,ENSP00000363149,ENSP00000363804,ENSP00000365380,ENSP00000370034,ENSP00000379616,ENSP00000405890,ENSP00000434024…	BHLHE40,CDK2,CENPA,E2F3,EPAS1,EZH2,FOSL1,FOXP3,H2AFX,KAT2B,KLF4,LMO2,MAF,MYH11,NOX4,NPR1,NR3C1,NR3C2,PBX1,RUNX1,SNAPC4,SOX4,SPDEF,SPIB,TFAP2C,TLR7
GO:0038023	signaling receptor activity	11	1429	0.0223	ENSP00000172229,ENSP00000231509,ENSP00000305416,ENSP00000311733,ENSP00000314807,ENSP00000321999,ENSP00000350815,ENSP00000357669,ENSP00000370034,ENSP00000376544,ENSP00000383115	CD79B,CMKLR1,COLEC12,IL1RAP,NGFR,NPR1,NR3C1,NR3C2,PTH1R,S1PR1,TLR7
GO:0097159	organic cyclic compound binding	26	5382	0.0225	ENSP00000201031,ENSP00000231509,ENSP00000244745,ENSP00000256495,ENSP00000257818,ENSP00000262904,ENSP00000263317,ENSP00000263734,ENSP00000263754,ENSP00000266970,ENSP00000298532,ENSP00000300305,ENSP00000310170,ENSP00000320147,ENSP00000327048,ENSP00000336868,ENSP00000350815,ENSP00000357669,ENSP00000363149,ENSP00000363804,ENSP00000365380,ENSP00000370034,ENSP00000379616,ENSP00000405890,ENSP00000434024…	BHLHE40,CDK2,CENPA,E2F3,EPAS1,EZH2,FOSL1,FOXP3,H2AFX,KAT2B,KLF4,LMO2,MAF,MYH11,NOX4,NPR1,NR3C1,NR3C2,PBX1,RUNX1,SNAPC4,SOX4,SPDEF,SPIB,TFAP2C,TLR7
GO:0042803	protein homodimerization activity	8	830	0.0229	ENSP00000256495,ENSP00000296370,ENSP00000300305,ENSP00000301633,ENSP00000321999,ENSP00000365380,ENSP00000376544,ENSP00000422591	BHLHE40,BIRC5,CD79B,FOXP3,PTH1R,RUNX1,S100P,SLIT2
GO:0035035	histone acetyltransferase binding	2	27	0.0259	ENSP00000263734,ENSP00000365380	EPAS1,FOXP3
GO:0043425	bHLH transcription factor binding	2	29	0.0289	ENSP00000256495,ENSP00000257818	BHLHE40,LMO2
GO:0042826	histone deacetylase binding	3	110	0.0335	ENSP00000263754,ENSP00000363804,ENSP00000365380	FOXP3,KAT2B,KLF4
GO:0001085	RNA polymerase II transcription factor binding	3	121	0.0423	ENSP00000256495,ENSP00000257818,ENSP00000363804	BHLHE40,KLF4,LMO2
GO:0004857	enzyme inhibitor activity	5	388	0.0423	ENSP00000263754,ENSP00000301633,ENSP00000323929,ENSP00000358525,ENSP00000422591	A2M,BIRC5,KAT2B,NGF,SLIT2
GO:0001102	RNA polymerase II activating transcription factor binding	2	39	0.0457	ENSP00000256495,ENSP00000257818	BHLHE40,LMO2
GO:0061629	RNA polymerase II-specific DNA-binding transcription factor binding	4	257	0.0493	ENSP00000256495,ENSP00000257818,ENSP00000363804,ENSP00000365380	BHLHE40,FOXP3,KLF4,LMO2
